# Supplementary material for: Evaluation of Microbiological and Physicochemical Parameters of Alternative Source of Drinking Water: A Case Study of Nzhelele River, South Africa
Source: Open Microbiol J. 2018 Feb 28;12:18–27. doi: 10.2174/1874285801812010018 (PMC5842400; doi:10.2174/1874285801812010018)
Supplement: Supplementary file 1 [file TOMICROJ-12-18_SD1.pdf]

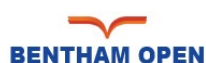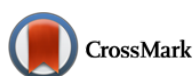

# The Open Microbiology Journal

## Supplementary Material

Content list available at: [www.benthamopen.com/TOMICROJ/](http://www.benthamopen.com/TOMICROJ/)

DOI: 10.2174/1874285801812010018

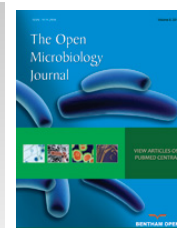

## Evaluation of Microbiological and Physicochemical Parameters of Alternative Source of Drinking Water: A Case Study of Nzhelele River, South Africa

Joshua N. Edokpayi<sup>\*,1</sup>, John O. Odiyo<sup>1</sup>, Elizabeth O. Popoola<sup>2</sup> and Titus A.M. Msagati<sup>3</sup><sup>1</sup>Department of Hydrology and Water Resources, University of Venda, Private Bag X5050, Thohoyandou, 0950, South Africa<sup>2</sup>Department of Chemical Sciences, Yaba College of Technology, Nigeria<sup>3</sup>College of Science, Engineering & Technology, Nanotechnology and Water Sustainability Research Unit, University of South Africa, South Africa

Received: November 21, 2017

Revised: January 11, 2018

Accepted: January 17, 2018

### Supplementary data 1. Average level of physicochemical parameter analysis.

| Months          | pH              | EC ( $\mu\text{S}/\text{cm}$ ) | Turbidity (NTU) |
|-----------------|-----------------|--------------------------------|-----------------|
| January         | 7.76 $\pm$ 0.25 | 83.47 $\pm$ 8.92               | 678 $\pm$ 38    |
| February        | 7.44 $\pm$ 0.45 | 101.45 $\pm$ 37                | 126 $\pm$ 8     |
| March           | 7.67 $\pm$ 0.05 | 97.93 $\pm$ 11.4               | 13.87 $\pm$ 2   |
| April           | 7.21 $\pm$ 0.13 | 120.68 $\pm$ 2.3               | 8.86 $\pm$ 0.77 |
| May             | 7.54 $\pm$ 0.07 | 130.07 $\pm$ 16.16             | 7.22 $\pm$ 2.03 |
| June            | 7.67 $\pm$ 0.06 | 136.07 $\pm$ 3.35              | 1.40 $\pm$ 0.2  |
| DWAF guidelines | 6.5-8.5         | <700                           | <1              |
| WHO guidelines  | 6.5-8.5         | 6000                           | <1              |

© 2018 Edokpayi *et al.*

This is an open access article distributed under the terms of the Creative Commons Attribution 4.0 International Public License (CC-BY 4.0), a copy of which is available at: (<https://creativecommons.org/licenses/by/4.0/legalcode>). This license permits unrestricted use, distribution, and reproduction in any medium, provided the original author and source are credited.
